# Supplementary material for: Hydroxypropyl-β-cyclodextrin enhanced fluorimetric method for the determination of melatonin and 5-methoxytryptamine
Source: Royal Society of Chemistry journal article supplement (doi:10.1039/b002332i), 2000-01-01
Supplement: esitable.doc [file esitable.doc]

**ELECTRONIC SUPPLEMENTARY INFORMATION**

**Table.** Recovery of **M** added to a pineal glanda

| Amount added,  10 -6M | Calibration Amount found,  10 –6 M  s b | Grafth Recovery  s b (%) | Method of Amount found,  10 –6 M  s b | standard additionRecovery  s b (%) |
| --- | --- | --- | --- | --- |
| 0.390 | 0.370  0.002 | 95.0  0.6 | 0.395  0.003 | 101.3  0.6 |
| 0.585 | 0.55  0.02 | 94  3 | 0.58  0.02 | 100  3 |
| 0.780 | 0.718  0.003 | 92.0  0.4 | 0.765  0.003 | 98.1  0.4 |
| 1.17 | 1.09  0.01 | 93.0  1 | 1.16  0.01 | 100  1 |
| 1.56 | 1.47  0.02 | 94  1 | 1.57  0.02 | 101  1 |

aAt pH= 7.00, 10 mmol dm-3 of HP--CD and 5% v/v of methanol. bs= standard deviation. Average of two determinations.
